# Supplementary material
Source: Springer Nature journal article supplement (https://www.springermedizin.de/resource/supplementary/12947_2011_433_MOESM7_ESM.pdf/9555734)

**I.****A) Control**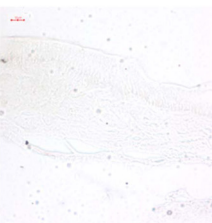**B) US**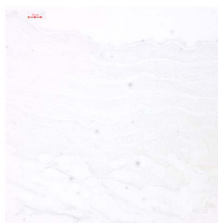**C) OPT**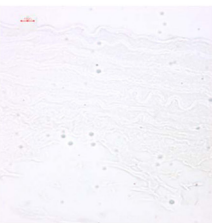**D) US+OPT**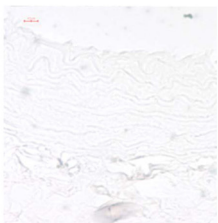**II.****A) Control**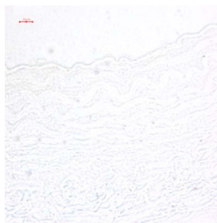**B) US**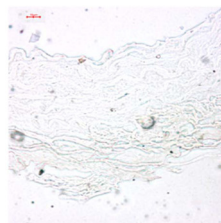**C) OPT**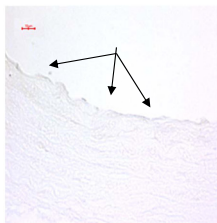**D) US+OPT**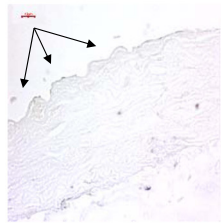

Supplement: MOESM7 [file 9555734]
